# Supplementary material
Source: publisher site journal article supplement (https://www.dovepress.com/article/342613)
Supplement: Supplementary file 1 [file get_supplementary_file.php]

Supplementary Table 1. The clinical characters of STAD patients.

| Clinical characters | Number |
| --- | --- |
| Gender  Male  Female | 28  24 |
| Age (years, x ± s) | 64.91 ± 7. |
| Smoking history  Yes  No | 25  27 |
| Stage  T1  T2  T3  T4 | 16  21  9  6 |
| Lymph node metastasis  M0  M1 | 47  5 |
